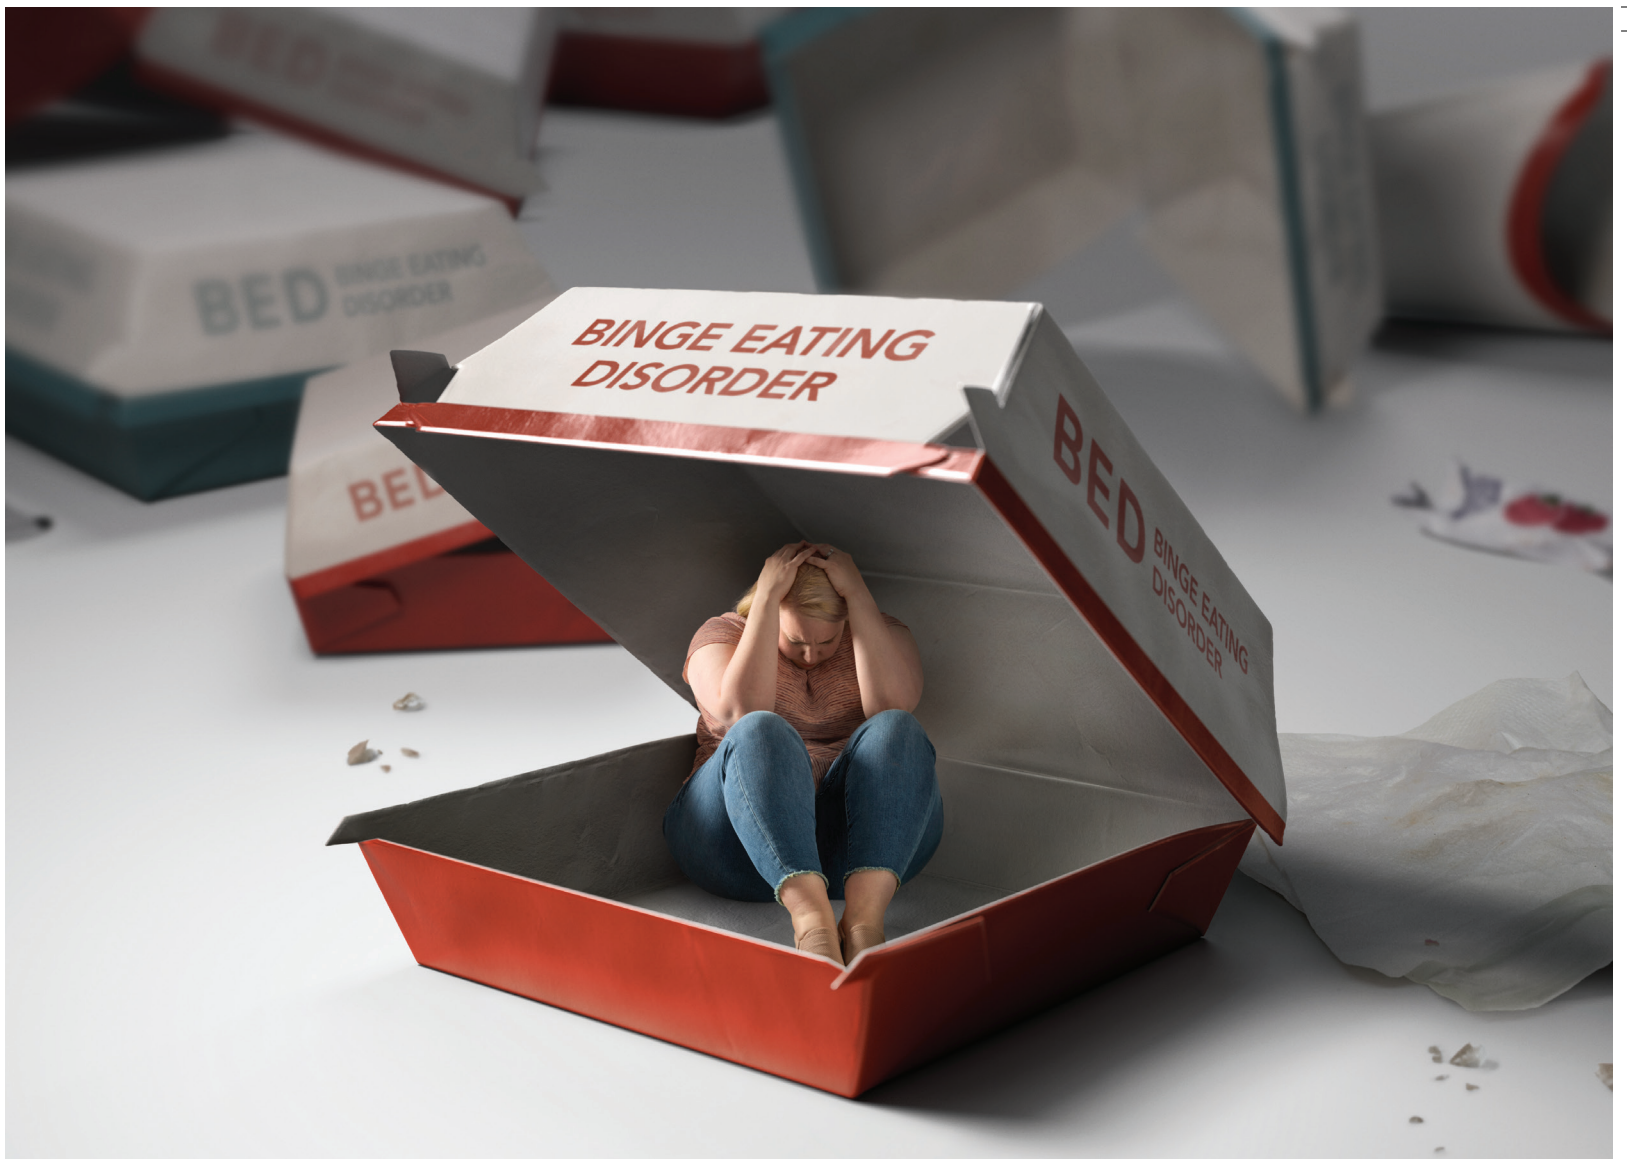

## BINGE EATING DISORDER (BED) CONSUMES HER

People with BED may feel trapped by compulsive eating behavior and obsessive thoughts around food<sup>1-3</sup>

BED is a neuropsychiatric condition that has been shown to significantly impact a patient's life, affecting both work and personal interactions.<sup>4,5</sup> But deep shame and guilt may cause people with BED to hide their symptoms<sup>4</sup>—even from their psychiatrists. Careful probing about BED symptoms may help patients feel more comfortable, so they don't shut down the conversation.<sup>6</sup>

► Visit [BurdenofBED.com](https://www.burdenofbed.com) to learn more and to download a Conversation Starter

Start the BED conversation

**References:** 1. Deal LS, Wirth RJ, Gasior M, et al. *Int J Eat Disord.* 2015;48(7):994-1004. 2. McElroy SL, Phillips KA, Keck PE, Jr. *J Clin Psychiatry.* 1994;55(10) suppl:33-51. 3. Beglin SJ, Fairburn CG. *Am J Psychiatry.* 1992;149(1):123-124. 4. American Psychiatric Association. Binge eating disorder. In: *Diagnostic and Statistical Manual of Mental Disorders, 5th ed.* Arlington, VA: American Psychiatric Association; 2013:350-353. 5. Rieger E, Wilfley DE, Stein RI, et al. *Int J Eat Disord.* 2005;37(3):234-240. 6. Kornstein SG, Keck PE Jr, Herman BK, et al. *Postgrad Med.* 2015;127(7):661-670.

SUNOVION and  are registered trademarks of Sumitomo Dainippon Pharma Co., Ltd. Sunovion Pharmaceuticals Inc. is a U.S. subsidiary of Sumitomo Dainippon Pharma Co., Ltd. © 2019 Sunovion Pharmaceuticals Inc. All rights reserved. 11/19 NPC-DAS-US-00085-19

 sunovion

Some of the greatest  
**masterpieces**  
are built on data.

**24** publications

**11** clinical studies

**2.5 million** treatments<sup>1</sup>

**As an industry leader in TMS,**  
our strategy in providing a path to  
remission<sup>2</sup> is paved with our data  
driven philosophy and durability.<sup>3</sup>  
That's why NeuroStar<sup>®</sup> Advanced  
Therapy is backed by the largest  
clinical data set in TMS for treating  
major depressive disorder (MDD).

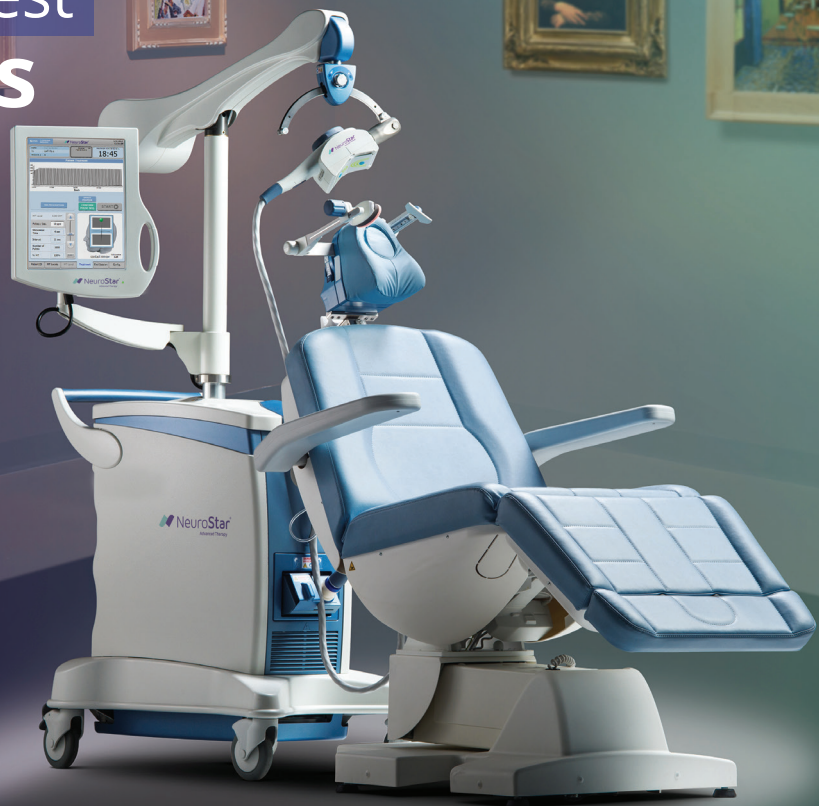

Experience the result of our dedication to data, durability, and efficacy with  
**NeuroStar<sup>®</sup> Advanced TMS Therapy.**

#### **INDICATION**

NeuroStar Advanced Therapy is indicated for the treatment of Major Depressive Disorder in adult patients who have failed to receive satisfactory improvement from prior antidepressant medication in the current episode. NeuroStar Advanced Therapy is only available by prescription. A doctor can help decide if NeuroStar Advanced Therapy is right for you.

#### **IMPORTANT SAFETY INFORMATION**

The most common side effect is pain or discomfort at or near the treatment site. These events are transient; they occur during the TMS treatment course and do not occur for most patients after the first week of treatment. There is a rare risk of seizure associated with the use of NeuroStar TMS (<0.1% per patient).

NeuroStar Advanced Therapy should not be used with patients who have non-removable conductive metal in or near the head. NeuroStar Advanced Therapy has not been studied in patients who have not received prior antidepressant treatment.

Please visit [NeuroStar.com](http://NeuroStar.com) for full safety and Prescribing Information.

1. Neuronetics Inc. Data on file.
2. Carpenter LL, et al. (2012). *Depress Anxiety* 29(7):587-596.
3. Dunner, D.L., et al. (2014). *J Clin Psych*; 75(12):1394-1401.

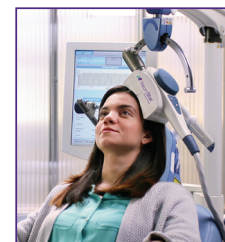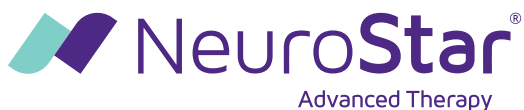

Call our Customer Service Center at:  
**1-877-600-7555** or visit [neurostar.com](http://neurostar.com)

# YOU CAN SAVE LIVES.

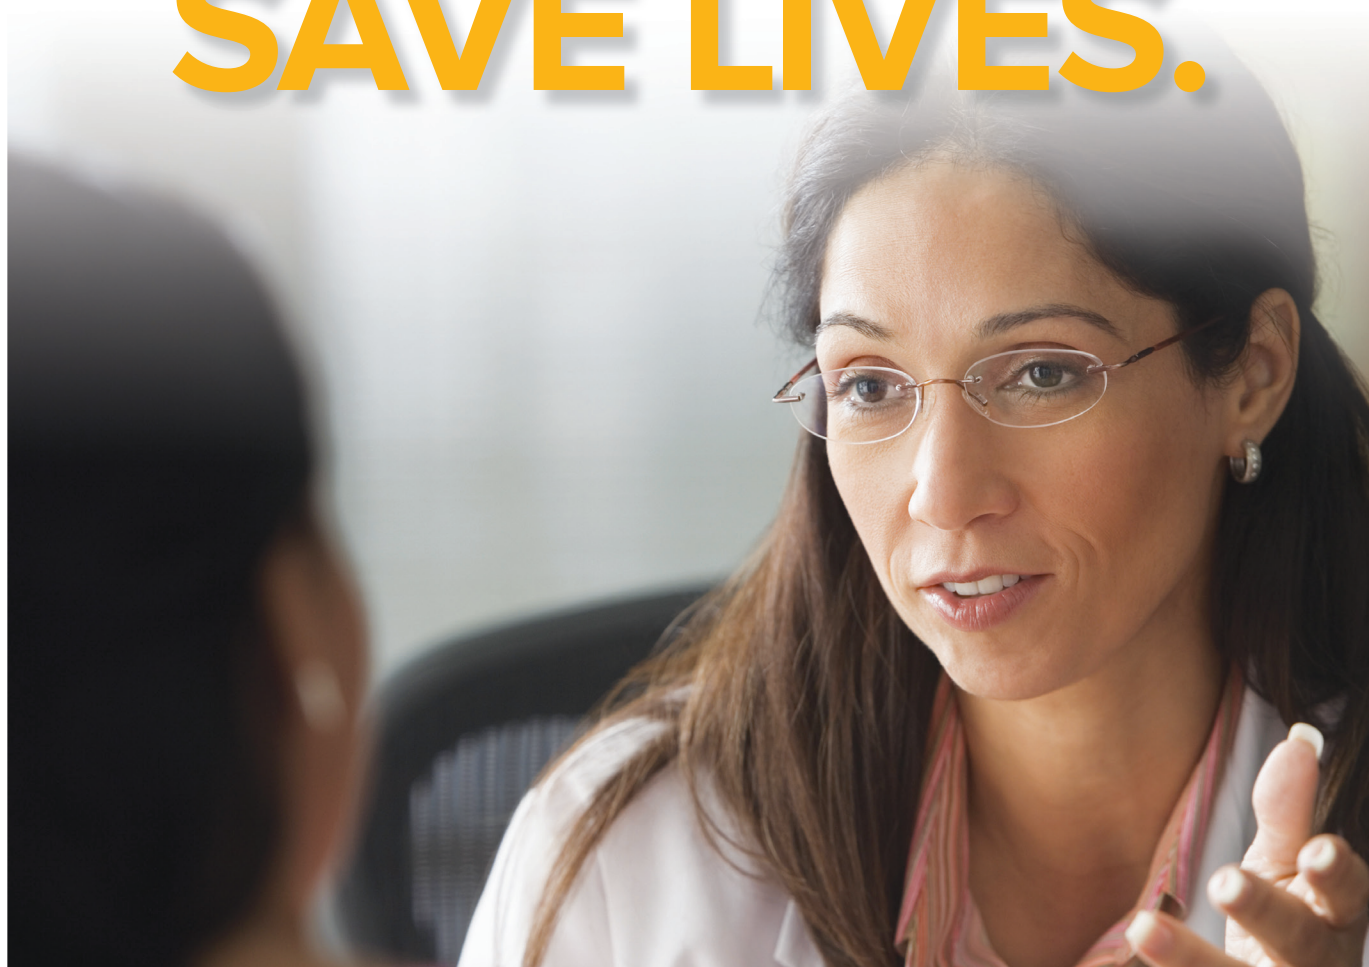

Treating tobacco use is an important part of mental health treatment.

Double your patients' chances of quitting with counseling and medication.

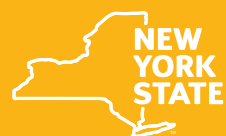

Department of Health

**TalkToYourPatients.health.ny.gov**

U.S. Dept. of Health and Human Services, Public Health Service, Treating Tobacco Use and Dependence Clinical Practice Guideline 2008 Update

PAID EDUCATIONAL ADVERTISEMENT

## Treating Tobacco use is an Important Part of Mental Health Treatment

### Six Things Every Health Care Provider Should Know

Providers who treat people with mental health conditions have an important role to play in their patients' ability to quit using tobacco products. Here are six things that every provider should know:

**1. Providing smoking cessation treatment is an important part of mental health treatment.**

Providers who treat people with mental health conditions are well positioned to help patients successfully quit tobacco use and enjoy the mental, emotional, and physical benefits of a tobacco-free life. Smoking cessation treatments work.

**2. Medicaid reimburses for counseling and covers FDA-approved smoking cessation medications, including over-the-counter therapies with a fiscal order.**

Medicaid will cover repeated treatment and prescriptions because it can take multiple attempts before patients quit successfully. Medicaid covers nicotine replacement therapies (NRT) – patch, gum, lozenge, inhaler and nasal spray; and two non-nicotine oral medications (pills) – bupropion SR (brand names Zyban or Wellbutrin) and varenicline (brand name Chantix).

**3. People with mental health conditions smoke at rates that are at least two times higher than the general population.<sup>1</sup>**

They may also smoke more heavily and frequently, compared to those without mental health conditions. The Centers for Disease Control and Prevention estimates that nearly one third (31%) of all cigarettes consumed in the United States are smoked by people with mental health conditions.<sup>1</sup>

**4. The high rates of smoking among people with mental health conditions have devastating health consequences.**

Smoking-related diseases such as cardiovascular disease, lung disease, and cancer are among the most common causes of death among adults with mental health conditions.<sup>2</sup> Despite the heavy disease burden, a US national survey of mental health treatment facilities found that only about one-quarter provided services to help patients quit smoking.<sup>3</sup>

**5. Many smokers with mental health conditions want to and are able to quit smoking.<sup>4</sup>**

Research has shown that adult smokers with mental health conditions—like other smokers—want to quit, can quit, and benefit from proven smoking cessation treatments.<sup>5</sup>

**6. Quitting smoking will not interfere with mental health recovery and may have mental health benefits.**

Smoking is not an effective mental health treatment strategy. On the contrary, smoking is associated with poor clinical outcomes, such as greater depressive symptoms, greater likelihood of psychiatric hospitalization, and increased suicidal behavior.<sup>4</sup>

References

- Centers for Disease Control and Prevention. (2013). Vital signs: Current cigarette smoking among adults aged ≥18 years with mental illness— United States, 2009–2011. *Morbidity and Mortality Weekly Report*, 62(5), 81–7.
- Druss, B. G., Zhao, L., Von Esenwein, S., Morrato, E. H., & Marcus, S. C. (2011). Understanding excess mortality in persons with mental illness: 17-Year follow up of a nationally representative US survey. *Medical Care*, 49(6), 599-604.
- Substance Abuse and Mental Health Services Administration. (2014). The National Mental Health Services Survey (N-MHSS) data spotlight report, November 25, 2014. [http://www.samhsa.gov/data/sites/default/files/Spot148\\_NMHSS\\_Smoking\\_Cessation/NMHSS-Spot148-QuitSmoking-2014.pdf](http://www.samhsa.gov/data/sites/default/files/Spot148_NMHSS_Smoking_Cessation/NMHSS-Spot148-QuitSmoking-2014.pdf). Accessed January 15, 2016.
- Prochaska, J. J. (2011). Smoking and mental illness—Breaking the link. *New England Journal of Medicine*, 365(3), 196-198.
- Siru, R., Hulse, G. K., & Tait, R. J. (2009). Assessing motivation to quit smoking in people with mental illness: a review. *Addiction*, 104(5), 719-733.

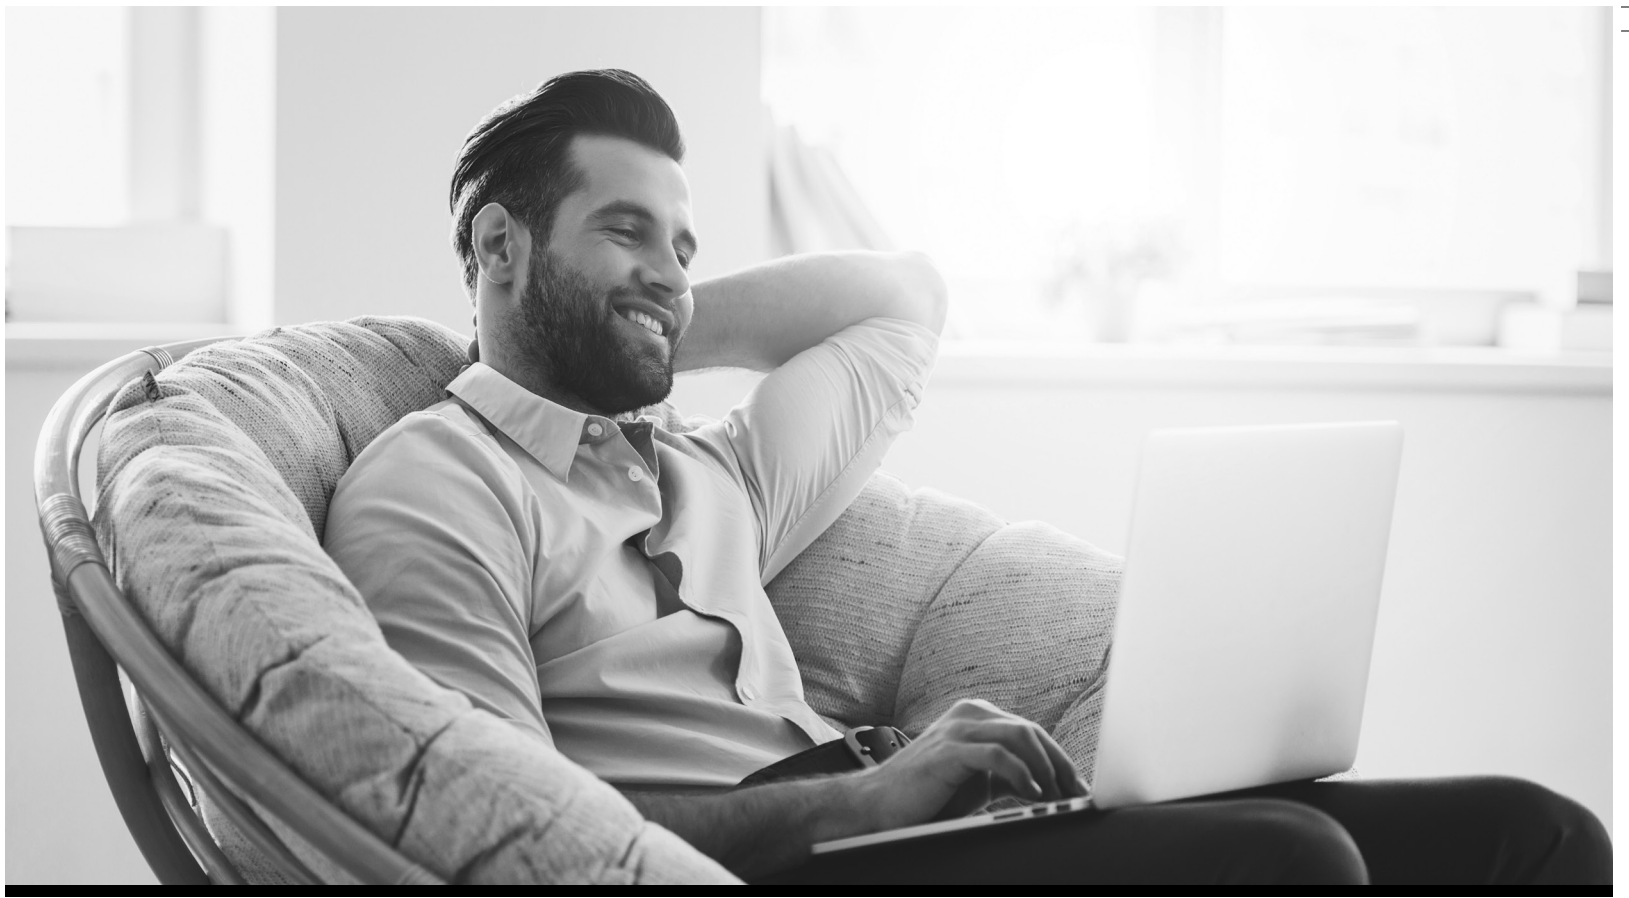

# **We've Got You Covered**

## **American Psychiatric Association's Endorsed Professional Liability Insurance**

Designed for Psychiatrists in all types of practice

Since 1984, we have been providing psychiatrists with exceptional protection and personalized service. We offer policies for individuals and group practices, which can include all disciplines in the mental health field. Our dedicated team of risk managers are available for emergency consultations 24/7 and other practice related inquiries during regular business hours. We do not surcharge for claims and there is no deductible.

**We are recognized for our extensive knowledge and have a reputation  
for exceptional customer service. Ask your colleagues!**

*(All discounts, coverage features and rating are subject to individual state approval.)*

Visit us at [ApaMalpractice.com](http://ApaMalpractice.com) or call **877.740.1777** to learn more.

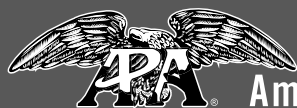

**American Professional Agency**

LEADERS IN PSYCHIATRIC MEDICAL LIABILITY INSURANCE

ENDORSED BY THE

AMERICAN  
**PSYCHIATRIC**  
ASSOCIATION

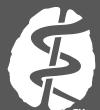

Source: http://ajp.psychiatryonline.org/doi/suppl/10.1176/ajp.2020.177.issue-2/suppl_file/front.pdf
