FEBRUARY 2020 | VOLUME 177 | NUMBER 2

# The American Journal of Psychiatry

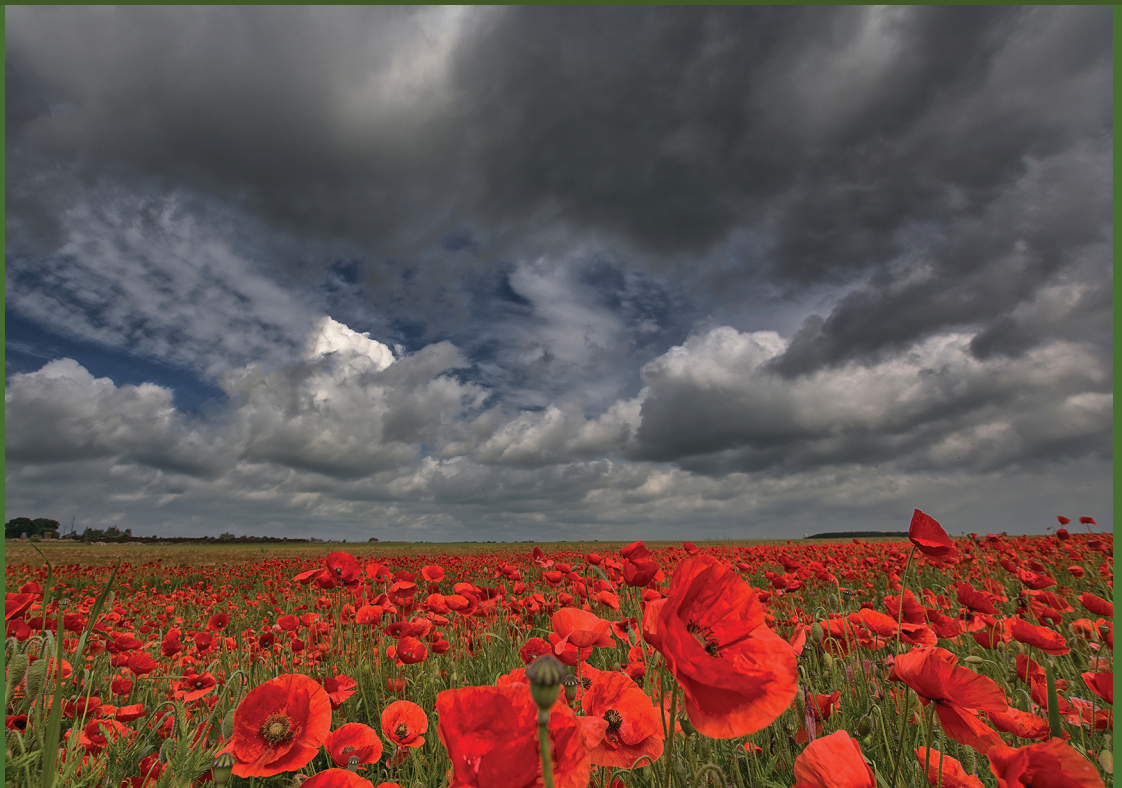

Personalizing the Treatment of Substance Use Disorders

Discontinuing Buprenorphine Treatment of Opioid  
Use Disorder: What Do We (Not) Know?

A Single Ketamine Infusion Combined With Motivational  
Enhancement Therapy for Alcohol Use Disorder

AMERICAN  
**PSYCHIATRIC**  
ASSOCIATION 

[ajp.psychiatryonline.org](http://ajp.psychiatryonline.org)
